# Supplementary material
Source: PubMed Central journal article supplement (PMC7450517)
Supplement: NIHMS1045181-supplement-Supplementary_file_3.pdf [file NIHMS1045181-supplement-Supplementary_file_3.pdf]

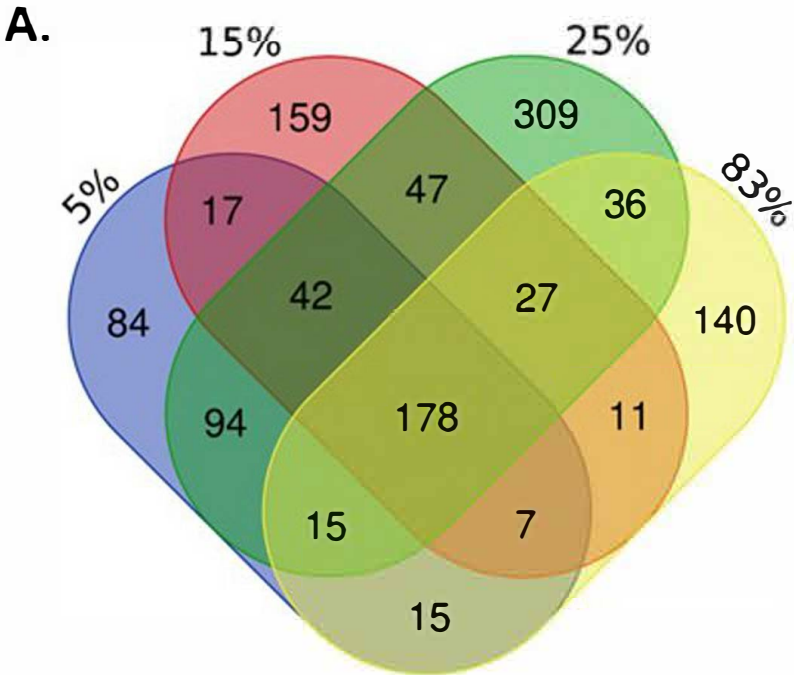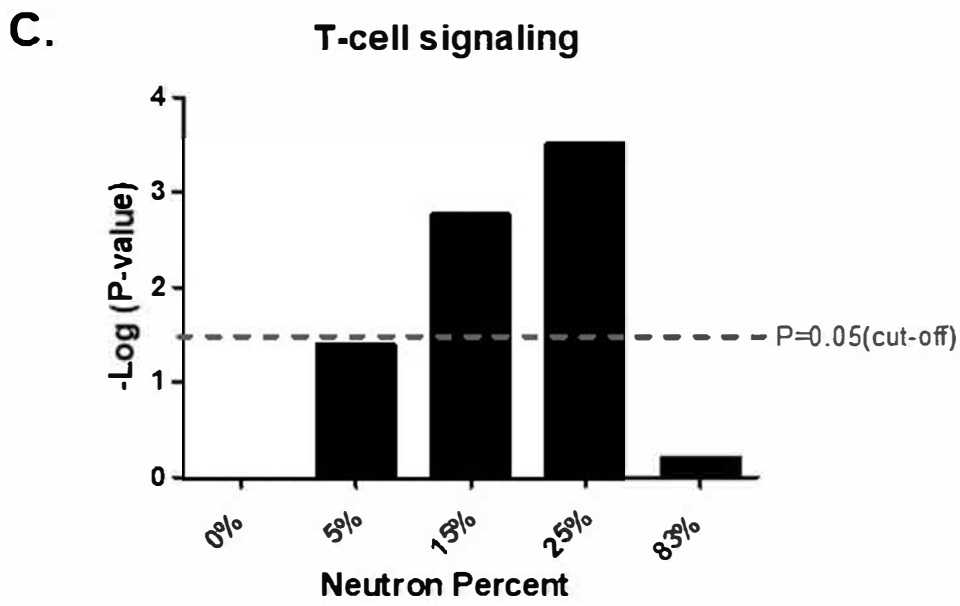

**B.**

|                                                              | 3 Gy X-ray                                                                                                                                                           | 3 Gy Mixed field exposures                                                                                                                                                                            |                                                                                                                                                                                                                                                                                             |                                                                                                                                                                                                                                                                                     | Max. Neutron (0.75 Gy)                                                                                                                                                 |
|--------------------------------------------------------------|----------------------------------------------------------------------------------------------------------------------------------------------------------------------|-------------------------------------------------------------------------------------------------------------------------------------------------------------------------------------------------------|---------------------------------------------------------------------------------------------------------------------------------------------------------------------------------------------------------------------------------------------------------------------------------------------|-------------------------------------------------------------------------------------------------------------------------------------------------------------------------------------------------------------------------------------------------------------------------------------|------------------------------------------------------------------------------------------------------------------------------------------------------------------------|
| Neutron percent                                              | 0%                                                                                                                                                                   | 5%                                                                                                                                                                                                    | 15%                                                                                                                                                                                                                                                                                         | 25%                                                                                                                                                                                                                                                                                 | 83%                                                                                                                                                                    |
| Number of Unique genes                                       | 75                                                                                                                                                                   | 84                                                                                                                                                                                                    | 159                                                                                                                                                                                                                                                                                         | 309                                                                                                                                                                                                                                                                                 | 140                                                                                                                                                                    |
| IPA analysis of top significant canonical pathways (P-value) | <ul style="list-style-type: none"> <li>Parkinson's signaling (1.27E-03)</li> <li>Amino acids Metabolism (3.28E-02)</li> <li>Calcium Metabolism (1.48E-02)</li> </ul> | <ul style="list-style-type: none"> <li>Amino acids Metabolism (4.92E-03)</li> <li>Notch Signaling (3.95E-03)</li> <li>Glucose Metabolism (1.1E-02)</li> <li>Protein Citrulation (1.22E-02)</li> </ul> | <ul style="list-style-type: none"> <li><b>Crosstalk between Dendritic cells and Natural Killer cells (7.22E-03)</b></li> <li><b>Negative Regulation T-cell signaling (1.3E-03)</b></li> <li>Death Receptor Signaling (8.15E-03)</li> <li>G-protein mediated signaling (1.43E-02)</li> </ul> | <ul style="list-style-type: none"> <li><b>Natural Killer-cell Signaling (7.64E-04)</b></li> <li><b>Negative regulation of T-cell Signaling (2.03E-04)</b></li> <li>Innate Immunity (1.21E-02)</li> <li>Communication between Innate and adaptive immune cells (1.02E-02)</li> </ul> | <ul style="list-style-type: none"> <li>Amino acid metabolism (9.50E-03)</li> <li>Hormone mediated signaling (1.53E-02)</li> <li>NAD Biosynthesis (1.01E-02)</li> </ul> |

**Supplementary File S1. Unique differentially expressed genes across all exposures.**

**A.** Number of unique differentially expressed genes at different neutron exposures (Figure 1A)

**B.** Table indicating top significant canonical pathways based on P-values (IPA analysis) associated with each set of unique genes for individual exposures (columns are color coded according to neutron percent as shown in A).

**C.** Unique Differentially expressed Genes involved in T-cell signaling plotted on the basis of p-value (-log) at different neutron exposures. T-cell signaling was not identified as a canonical pathway in the unique gene set at 0% Neutron (3 Gy x-ray). The pathway is not significant at 5% and 83% Neutron exposures.

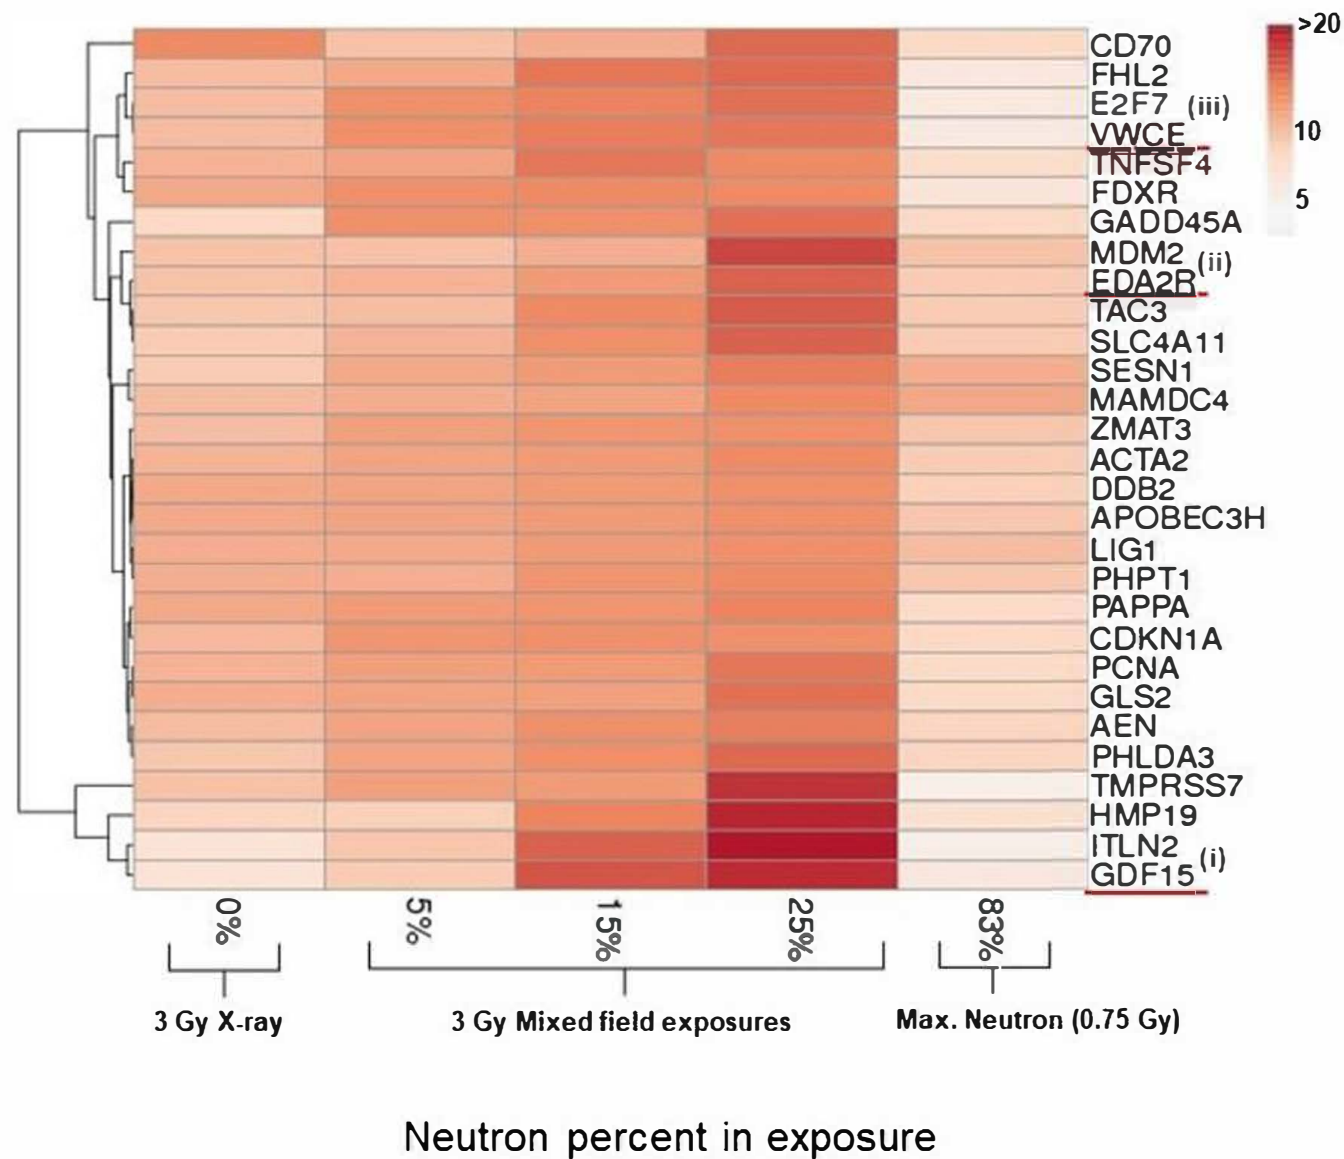

**Supplementary File S2. Genes showing increased expression with increasing neutron percent in the exposures. The expression level at 83% neutron (max. 0.75 Gy) has been added for comparison.** Heat map of expression of p53 responsive genes which showed increased trend of expression with increasing neutron percent in mixed field exposures from 0%-25% as observed in microarray. The color indicate fold change compared to controls (non-exposed). Each column represents average of 5 individuals per radiation category. Genes with red underline are validated using qRT-PCR(Figure 2)

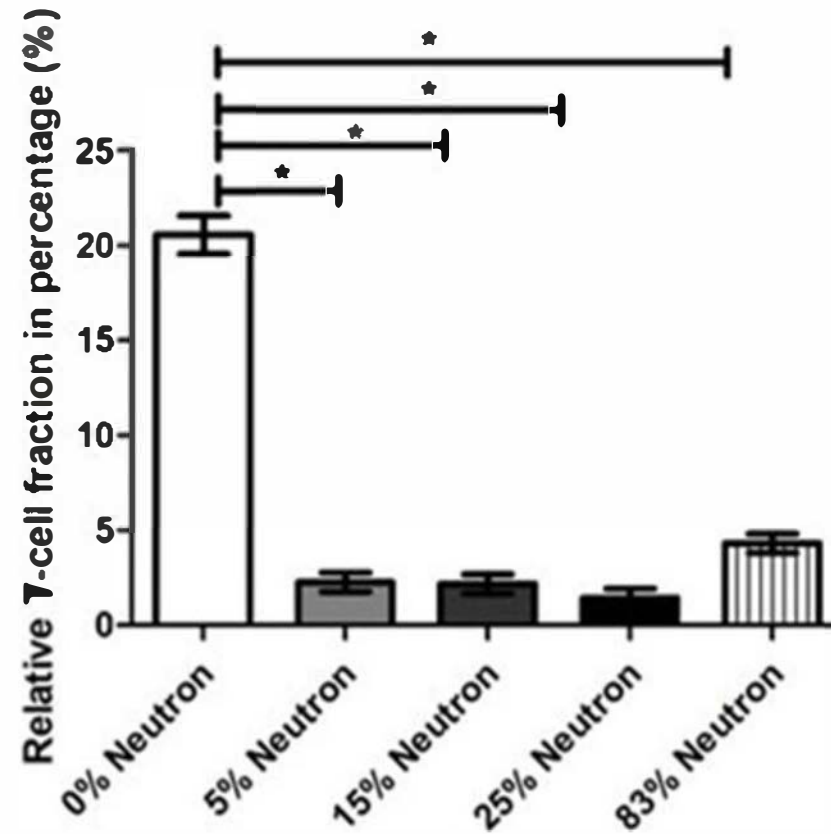

**Supplementary File S3. Using CIBERSORT tool (reference 37) differentially expressed genes ( $P < 0.001$ ) at each neutron-photon exposure were compared with the expression levels of a standard matrix of blood-cell marker genes to calculate relative percentages of blood cell sub-types contributing to the overall profile. The bars indicate mean T-cell fractions from 5 different individual samples for each neutron exposure. The estimated percentage of other cell types in the blood had poor statistical confidence ( $p > 0.05$ ), and thus not included in the analysis. Error bars indicate  $\pm$  SD ( $n=5$ ). \* Significant at  $P < 0.05$  using T-test compared to 0%Neutron (3 Gy x-ray). The T-cell fraction (percentage%) is relative to the levels in controls.**
